# Supplementary material
Source: MDPI journal article supplement (https://www.mdpi.com/1999-4907/14/8/1560)
Supplement: s1 [file s1]

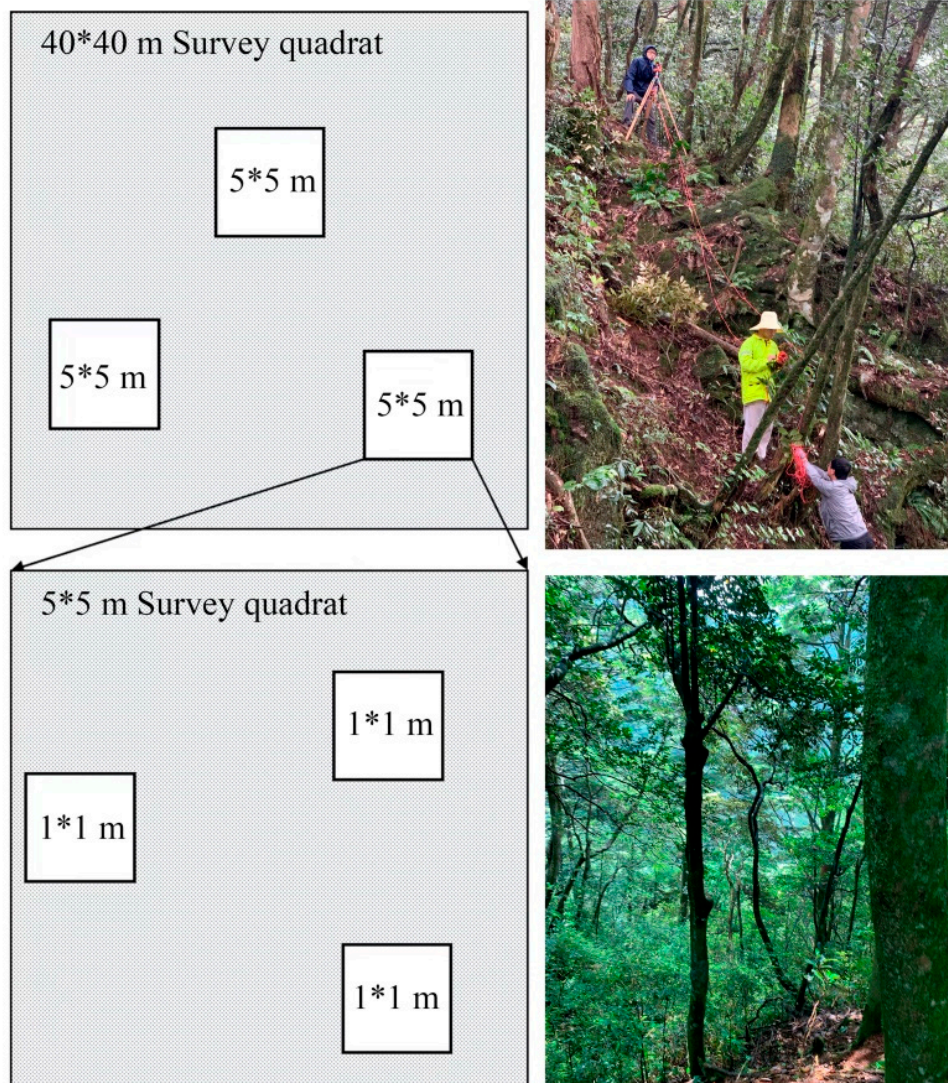

Figure S1. 40\*40meter survey plots, vegetation status, and photographs of field surveys

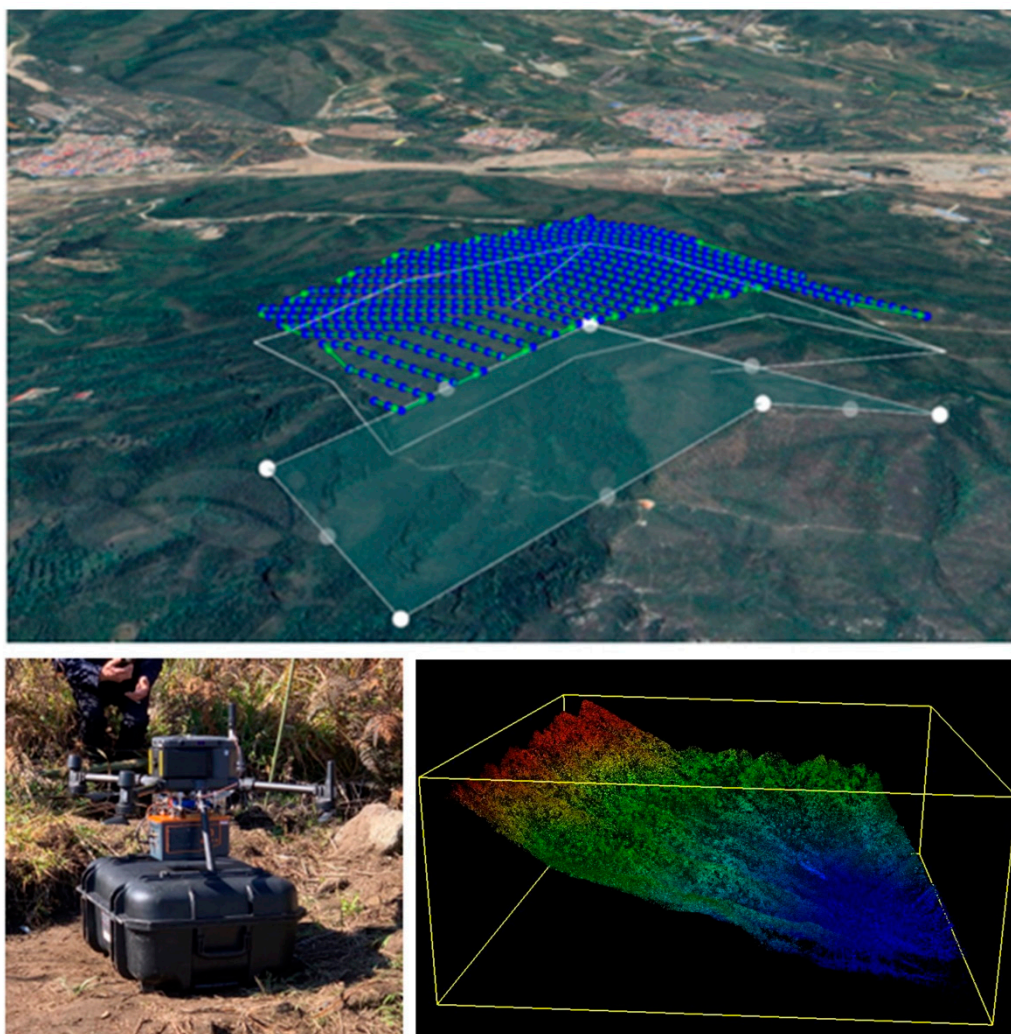

Figure S2 Three-dimensional digital elevation model (DEM) of the study area, photographs of the UAV equipment, and a schematic diagram of the UAV flight path planning.
